# Supplementary material for: Assessment of aquatic food web and trophic niche as a measurement of recovery function in restored mangroves in the Southern Gulf of Mexico
Source: PeerJ. 2023 Jun 6;11:e15422. doi: 10.7717/peerj.15422 (PMC10252823; doi:10.7717/peerj.15422)
Supplement: Supplemental Information 1 [file peerj-11-15422-s001.xlsx]

## Sheet: T1
δ13C and δ15N values (SD) of reference materials used in the analysis of stable isotopes.
	δ13C (‰)		δ15N (‰)
References	mean	SD	mean	SD	Use
Alfalfa Flour	-29.6318	0.0377217	1.7044	0.0970274	Linearity Correction, Elemental Totals
Amaranth Flour	-12.8283	0.0678336	2.50902	0.0669012	Quality Control
Caffeine	-35.0478	0.0371729	-2.8507	0.037975	13C Scale Normalization, 15N Quality Control
Chitin	-18.9454	0.0792689	2.17392	0.136055	Linearity Correction, Elemental Totals
Enriched Alanine			41.1298	0.0883974	15N Scale Normalization
Glutamic Acid (GLAC)	-11.0719	0.0345561	-8.52596	0.0408164	13C, 15N Scale Normalization
Keratin	-24.3598	0.0364967	4.76554	0.0487526	Quality Control
Nylon Powder (NYPOW)	-24.7061	0.0486492	-1.02605	0.0644579	Drift correction

## Sheet: T2
Log data of environmental variables used in principal components analysis.
TDS = total dissolved solids; DO = dissolved oxygen; RM1 = mangrove restored in 2010; RM2 = mangrove restored in 2014; RM3 = mangrove restored in 2018; RefM = reference mangrove.
Season	Restauration status	Depth	Temperature	TDS	Conductivity	Salinity	DO	pH	Chlorophyll a
rainy	MR1	1.97772	1.48487	1.31133	1.60206	1.40518	0.591836	0.906335	0.952755
rainy	MR1	2.0569	1.48401	1.30746	1.59791	1.39933	0.36035	0.922725	0.924279
rainy	MR1	2.10037	1.48883	1.30479	1.59506	1.39568	0.573755	0.931966	0.865865
rainy	MR3	2.06446	1.50202	1.30038	1.59028	1.39672	0.401401	0.917506	0.809737
rainy	MR3	1.98227	1.51534	1.2971	1.58659	1.39182	0.456366	0.924279	0.983777
rainy	MR3	2.04532	1.51746	1.29667	1.58659	1.39182	0.623249	0.932474	0.983777
rainy	MR2	2.13354	1.52297	1.28035	1.56914	1.37328	0.510545	0.92737	1.10857
rainy	MR2	2.11059	1.55388	1.28035	1.56914	1.37328	0.600973	0.935507	1.0361
rainy	MR2	2.13354	1.53908	1.28217	1.56984	1.37291	0.705008	0.93852	0.893804
rainy	RM	2.11727	1.47842	1.30146	1.59162	1.39881	0.287802	0.912222	0.994757
rainy	RM	2.06819	1.47494	1.29798	1.58816	1.39498	0.342423	0.914872	1.10857
rainy	RM	2.04532	1.47871	1.2927	1.5824	1.38881	0.356026	0.924796	0.773299
nortes	MR1	1.5682	1.36736	1.48629	1.64638	1.48544	0.735599	0.948413	1.05869
nortes	MR1	1.81954	1.37291	1.48316	1.64577	1.48187	0.753583	0.950365	0.994757
nortes	MR1	2.00432	1.3784	1.48244	1.6471	1.48101	0.777427	0.951823	0.924279
nortes	MR3	1.43136	1.51851	1.49721	1.7313	1.49388	0.684845	0.931458	0.702117
nortes	MR3	1.25527	1.51983	1.50229	1.73819	1.49969	0.82866	0.93852	0.952755
nortes	MR3	1.41497	1.45025	1.4915	1.69113	1.47538	0.539076	0.918555	0.672098
nortes	MR2	1.92428	1.43136	1.50678	1.69745	1.50745	0.862728	0.950365	0.924279
nortes	MR2	1.90849	1.42325	1.50664	1.693	1.50732	0.866287	0.950365	0.893804
nortes	MR2	1.83885	1.40654	1.57553	1.6901	1.51574	0.801404	0.943495	0.865865
nortes	RM	1.63347	1.44809	1.30643	1.59704	1.405	0.612784	0.935003	1.13108
nortes	RM	1.60206	1.46255	1.30578	1.59572	1.40381	0.693727	0.940516	1.34176
nortes	RM	1.72428	1.45332	1.36192	1.65663	1.45056	0.657056	0.917506	1.47149
dry	MR1	1.6721	1.47276	1.61584	1.82875	1.62951	0.684845	0.951338	0.952755
dry	MR1	1.93952	1.46687	1.61289	1.82214	1.62613	0.657056	0.951823	0.873611
dry	MR1	2.00432	1.4609	1.61087	1.81744	1.62408	0.665581	0.947924	1.01483
dry	MR3	1.8451	1.45637	1.66987	1.8734	1.69108	0.361728	0.933993	0.750123
dry	MR3	1.70757	1.46982	1.66427	1.87559	1.68431	0.570543	0.943989	0.924279
dry	MR3	1.77815	1.48996	1.67587	1.89843	1.69793	0.550228	0.943495	0.620285
dry	MR2	1.85126	1.51851	1.67089	1.90884	1.6917	0.770852	0.957128	0.983777
dry	MR2	1.94448	1.53529	1.67779	1.92434	1.69854	0.881385	0.960946	0.924279
dry	MR2	1.93952	1.55751	1.66474	1.91921	1.68359	1.02366	0.966611	0.893804
dry	RM	1.94448	1.47422	1.59051	1.80373	1.60065	0.485721	0.932981	0.801266
dry	RM	1.86923	1.48287	1.60821	1.8253	1.61982	0.604226	0.936011	0.848469
dry	RM	1.91908	1.48996	1.60119	1.82225	1.61247	0.641474	0.943989	0.625044

## Sheet: T3
Raw data of δ13C and δ15N values of C3 plants, seston and phytoplankton per area and season.
RM1 = mangrove restored in 2010; RM2 = mangrove restored in 2014; RM3 = mangrove restored in 2018; RefM = reference mangrove.
ID	Season	Coordinates	Restauration status	Species	δ13C	δ15N
C3-R-RM1-1	rainy	18.6721 N, -91.6721 W	RM1	Rhizophora mangle	-26.4	2.1
C3-R-RM1-2	rainy	18.6721 N, -91.6721 W	RM1	Rhizophora mangle	-26.1	1.5
C3-R-RM1-3	rainy	18.6721 N, -91.6721 W	RM1	Rhizophora mangle	-26.3	1.9
C3-R-RM1-4	rainy	18.6721 N, -91.6721 W	RM1	Avicennia germinans	-27.7	6.9
C3-R-RM1-5	rainy	18.6721 N, -91.6721 W	RM1	Avicennia germinans	-26.7	4.7
C3-R-RM1-6	rainy	18.6721 N, -91.6721 W	RM1	Avicennia germinans	-28.1	5.7
C3-R-RM1-7	rainy	18.6721 N, -91.6721 W	RM1	Laguncularia racemosa	-26.7	2.3
C3-R-RM1-8	rainy	18.6721 N, -91.6721 W	RM1	Laguncularia racemosa	-28.1	1.6
C3-R-RM1-9	rainy	18.6721 N, -91.6721 W	RM1	Laguncularia racemosa	-30.6	2.9
C3-R-RM1-10	rainy	18.6721 N, -91.6721 W	RM1	Batis maritima	-27.2	5.4
C3-R-RM1-11	rainy	18.6721 N, -91.6721 W	RM1	Batis maritima	-29.3	5.8
C3-R-RM1-12	rainy	18.6721 N, -91.6721 W	RM1	Batis maritima	-30.1	4
Ses-R-RM1-1	rainy	18.6721 N, -91.6721 W	RM1	seston	-24	3.2
Ses-R-RM1-2	rainy	18.6721 N, -91.6721 W	RM1	seston	-25.7	3.4
Ses-R-RM1-3	rainy	18.6721 N, -91.6721 W	RM1	seston	-24.7	3
Phy-R-RM1-1	rainy	18.6721 N, -91.6721 W	RM1	phytoplankton	-24.7	5
Phy-R-RM1-2	rainy	18.6721 N, -91.6721 W	RM1	phytoplankton	-24.3	4.3
Phy-R-RM1-3	rainy	18.6721 N, -91.6721 W	RM1	phytoplankton	-22.3	3.7
C3-R-RM2-1	rainy	18.6928 N, -91.6411 W	RM2	Rhizophora mangle	-25	-4.9
C3-R-RM2-2	rainy	18.6928 N, -91.6411 W	RM2	Rhizophora mangle	-24.9	-4.3
C3-R-RM2-3	rainy	18.6928 N, -91.6411 W	RM2	Rhizophora mangle	-25.8	-5.1
C3-R-RM2-4	rainy	18.6928 N, -91.6411 W	RM2	Avicennia germinans	-26	0.8
C3-R-RM2-5	rainy	18.6928 N, -91.6411 W	RM2	Avicennia germinans	-26.6	-6.7
C3-R-RM2-6	rainy	18.6928 N, -91.6411 W	RM2	Avicennia germinans	-25.7	3
C3-R-RM2-7	rainy	18.6928 N, -91.6411 W	RM2	Laguncularia racemosa	-27.7	-1.9
C3-R-RM2-8	rainy	18.6928 N, -91.6411 W	RM2	Laguncularia racemosa	-28	-6.5
C3-R-RM2-9	rainy	18.6928 N, -91.6411 W	RM2	Laguncularia racemosa	-28	1.4
C3-R-RM2-10	rainy	18.6928 N, -91.6411 W	RM2	Batis maritima	-27.3	2.6
C3-R-RM2-11	rainy	18.6928 N, -91.6411 W	RM2	Batis maritima	-25.8	-4.1
C3-R-RM2-12	rainy	18.6928 N, -91.6411 W	RM2	Batis maritima	-28.3	1.5
Ses-R-RM2-1	rainy	18.6928 N, -91.6411 W	RM2	seston	-26.4	2.4
Ses-R-RM2-2	rainy	18.6928 N, -91.6411 W	RM2	seston	-27.5	2.6
Ses-R-RM2-3	rainy	18.6928 N, -91.6411 W	RM2	seston	-24.6	3.1
Phy-R-RM2-1	rainy	18.6928 N, -91.6411 W	RM2	phytoplankton	-25	5
Phy-R-RM2-2	rainy	18.6928 N, -91.6411 W	RM2	phytoplankton	-23.2	4.3
Phy-R-RM2-3	rainy	18.6928 N, -91.6411 W	RM2	phytoplankton	-24.5	4.7
C3-R-RM3-1	rainy	18.6896 N, -91.6596 W	RM3	Rhizophora mangle	-25.8	-5.9
C3-R-RM3-2	rainy	18.6896 N, -91.6596 W	RM3	Rhizophora mangle	-25.7	-5
C3-R-RM3-3	rainy	18.6896 N, -91.6596 W	RM3	Rhizophora mangle	-26.7	-5.1
C3-R-RM3-4	rainy	18.6896 N, -91.6596 W	RM3	Avicennia germinans	-25.9	2.3
C3-R-RM3-5	rainy	18.6896 N, -91.6596 W	RM3	Avicennia germinans	-25.5	2.7
C3-R-RM3-6	rainy	18.6896 N, -91.6596 W	RM3	Avicennia germinans	-25.3	5.4
C3-R-RM3-7	rainy	18.6896 N, -91.6596 W	RM3	Laguncularia racemosa	-26.8	-6.8
C3-R-RM3-8	rainy	18.6896 N, -91.6596 W	RM3	Laguncularia racemosa	-27.5	-0.4
C3-R-RM3-9	rainy	18.6896 N, -91.6596 W	RM3	Laguncularia racemosa	-27.2	-1.7
C3-R-RM3-10	rainy	18.6896 N, -91.6596 W	RM3	Batis maritima	-27.7	3.4
C3-R-RM3-11	rainy	18.6896 N, -91.6596 W	RM3	Batis maritima	-26.2	2.9
C3-R-RM3-12	rainy	18.6896 N, -91.6596 W	RM3	Batis maritima	-27	0.3
Ses-R-RM3-1	rainy	18.6896 N, -91.6596 W	RM3	seston	-24.9	3
Ses-R-RM3-2	rainy	18.6896 N, -91.6596 W	RM3	seston	-25.3	1.9
Ses-R-RM3-3	rainy	18.6896 N, -91.6596 W	RM3	seston	-26.2	2.8
Phy-R-RM3-1	rainy	18.6896 N, -91.6596 W	RM3	phytoplankton	-25.3	4.9
Phy-R-RM3-2	rainy	18.6896 N, -91.6596 W	RM3	phytoplankton	-24.3	1.6
Phy-R-RM3-3	rainy	18.6896 N, -91.6596 W	RM3	phytoplankton	-23.5	3.3
C3-R-RefM-1	rainy	18.7028 N, -91.6424 W	RefM	Rhizophora mangle	-29.5	0.9
C3-R-RefM-2	rainy	18.7028 N, -91.6424 W	RefM	Rhizophora mangle	-30.7	1.3
C3-R-RefM-3	rainy	18.7028 N, -91.6424 W	RefM	Rhizophora mangle	-26.4	1.2
C3-R-RefM-4	rainy	18.7028 N, -91.6424 W	RefM	Avicennia germinans	-27.6	5.1
C3-R-RefM-5	rainy	18.7028 N, -91.6424 W	RefM	Avicennia germinans	-26.7	4
C3-R-RefM-6	rainy	18.7028 N, -91.6424 W	RefM	Avicennia germinans	-27.4	5.8
C3-R-RefM-7	rainy	18.7028 N, -91.6424 W	RefM	Laguncularia racemosa	-28.2	2.1
C3-R-RefM-8	rainy	18.7028 N, -91.6424 W	RefM	Laguncularia racemosa	-30.3	1.9
C3-R-RefM-9	rainy	18.7028 N, -91.6424 W	RefM	Laguncularia racemosa	-29.1	2.3
Ses-R-RefM-1	rainy	18.7028 N, -91.6424 W	RefM	seston	-26.5	3.1
Ses-R-RefM-2	rainy	18.7028 N, -91.6424 W	RefM	seston	-25.7	3.7
Ses-R-RefM-3	rainy	18.7028 N, -91.6424 W	RefM	seston	-25.5	3.6
Phy-R-RefM-1	rainy	18.7028 N, -91.6424 W	RefM	phytoplankton	-23.7	3.8
Phy-R-RefM-2	rainy	18.7028 N, -91.6424 W	RefM	phytoplankton	-25	3.7
Phy-R-RefM-3	rainy	18.7028 N, -91.6424 W	RefM	phytoplankton	-23.7	3.9
C3-N-RM1-1	nortes	18.6721 N, -91.6721 W	RM1	Rhizophora mangle	-26.9	1.2
C3-N-RM1-2	nortes	18.6721 N, -91.6721 W	RM1	Rhizophora mangle	-29.4	0.2
C3-N-RM1-3	nortes	18.6721 N, -91.6721 W	RM1	Rhizophora mangle	-26.8	1.6
C3-N-RM1-4	nortes	18.6721 N, -91.6721 W	RM1	Avicennia germinans	-28.5	4.4
C3-N-RM1-5	nortes	18.6721 N, -91.6721 W	RM1	Avicennia germinans	-27.9	3.9
C3-N-RM1-6	nortes	18.6721 N, -91.6721 W	RM1	Avicennia germinans	-29	7
C3-N-RM1-7	nortes	18.6721 N, -91.6721 W	RM1	Laguncularia racemosa	-27.7	-1.1
C3-N-RM1-8	nortes	18.6721 N, -91.6721 W	RM1	Laguncularia racemosa	-29.1	-2.1
C3-N-RM1-9	nortes	18.6721 N, -91.6721 W	RM1	Laguncularia racemosa	-30.8	3.7
C3-N-RM1-10	nortes	18.6721 N, -91.6721 W	RM1	Batis maritima	-29	3
C3-N-RM1-11	nortes	18.6721 N, -91.6721 W	RM1	Batis maritima	-30.8	5.9
Ses-N-RM1-1	nortes	18.6721 N, -91.6721 W	RM1	seston	-19.8	1.7
Ses-N-RM1-2	nortes	18.6721 N, -91.6721 W	RM1	seston	-14.5	1.7
Ses-N-RM1-3	nortes	18.6721 N, -91.6721 W	RM1	seston	-19.1	1.9
Phy-N-RM1-1	nortes	18.6721 N, -91.6721 W	RM1	phytoplankton	-21.3	2.5
Phy-N-RM1-2	nortes	18.6721 N, -91.6721 W	RM1	phytoplankton	-21	2.8
Phy-N-RM1-3	nortes	18.6721 N, -91.6721 W	RM1	phytoplankton	-22.4	2.6
C3-N-RM2-1	nortes	18.6928 N, -91.6411 W	RM2	Rhizophora mangle	-26.6	-3.9
C3-N-RM2-2	nortes	18.6928 N, -91.6411 W	RM2	Rhizophora mangle	-24.8	-3.9
C3-N-RM2-3	nortes	18.6928 N, -91.6411 W	RM2	Rhizophora mangle	-26.6	-3.7
C3-N-RM2-4	nortes	18.6928 N, -91.6411 W	RM2	Avicennia germinans	-27.2	3.7
C3-N-RM2-5	nortes	18.6928 N, -91.6411 W	RM2	Avicennia germinans	-27.1	-3
C3-N-RM2-6	nortes	18.6928 N, -91.6411 W	RM2	Avicennia germinans	-26.1	-2.3
C3-N-RM2-7	nortes	18.6928 N, -91.6411 W	RM2	Laguncularia racemosa	-27.4	-4.5
C3-N-RM2-8	nortes	18.6928 N, -91.6411 W	RM2	Laguncularia racemosa	-29.9	-7.4
C3-N-RM2-9	nortes	18.6928 N, -91.6411 W	RM2	Laguncularia racemosa	-27.1	-2.6
C3-N-RM2-10	nortes	18.6928 N, -91.6411 W	RM2	Batis maritima	-31.5	1.1
C3-N-RM2-11	nortes	18.6928 N, -91.6411 W	RM2	Batis maritima	-29.1	-1.4
C3-N-RM2-12	nortes	18.6928 N, -91.6411 W	RM2	Batis maritima	-29.5	0.9
Ses-N-RM2-1	nortes	18.6928 N, -91.6411 W	RM2	seston	-20.2	2.1
Ses-N-RM2-2	nortes	18.6928 N, -91.6411 W	RM2	seston	-18.9	2
Ses-N-RM2-3	nortes	18.6928 N, -91.6411 W	RM2	seston	-19	2.4
Phy-N-RM2-1	nortes	18.6928 N, -91.6411 W	RM2	phytoplankton	-19.8	3.9
Phy-N-RM2-2	nortes	18.6928 N, -91.6411 W	RM2	phytoplankton	-20.2	3.7
Phy-N-RM2-3	nortes	18.6928 N, -91.6411 W	RM2	phytoplankton	-21	3.2
C3-N-RM3-1	nortes	18.6896 N, -91.6596 W	RM3	Rhizophora mangle	-26.7	-7.3
C3-N-RM3-2	nortes	18.6896 N, -91.6596 W	RM3	Rhizophora mangle	-26.9	-5.6
C3-N-RM3-3	nortes	18.6896 N, -91.6596 W	RM3	Rhizophora mangle	-27.1	-4.5
C3-N-RM3-4	nortes	18.6896 N, -91.6596 W	RM3	Avicennia germinans	-27.5	-5.1
C3-N-RM3-5	nortes	18.6896 N, -91.6596 W	RM3	Avicennia germinans	-26.4	4.6
C3-N-RM3-6	nortes	18.6896 N, -91.6596 W	RM3	Avicennia germinans	-27.3	-0.7
C3-N-RM3-7	nortes	18.6896 N, -91.6596 W	RM3	Laguncularia racemosa	-28.4	-4.7
C3-N-RM3-8	nortes	18.6896 N, -91.6596 W	RM3	Laguncularia racemosa	-28.3	-1.3
C3-N-RM3-9	nortes	18.6896 N, -91.6596 W	RM3	Batis maritima	-28.3	4
C3-N-RM3-10	nortes	18.6896 N, -91.6596 W	RM3	Batis maritima	-30	3.2
Ses-N-RM3-1	nortes	18.6896 N, -91.6596 W	RM3	seston	-23	0.6
Ses-N-RM3-2	nortes	18.6896 N, -91.6596 W	RM3	seston	-21.3	1.4
Ses-N-RM3-3	nortes	18.6896 N, -91.6596 W	RM3	seston	-22.8	1.1
Phy-N-RM3-1	nortes	18.6896 N, -91.6596 W	RM3	phytoplankton	-22.6	2.9
Phy-N-RM3-2	nortes	18.6896 N, -91.6596 W	RM3	phytoplankton	-22.4	1.6
Phy-N-RM3-3	nortes	18.6896 N, -91.6596 W	RM3	phytoplankton	-21.8	1.8
C3-N-RefM-1	nortes	18.7028 N, -91.6424 W	RefM	Rhizophora mangle	-29.5	0.2
C3-N-RefM-2	nortes	18.7028 N, -91.6424 W	RefM	Rhizophora mangle	-31.3	0.4
C3-N-RefM-3	nortes	18.7028 N, -91.6424 W	RefM	Rhizophora mangle	-27.2	1.1
C3-N-RefM-4	nortes	18.7028 N, -91.6424 W	RefM	Avicennia germinans	-28.9	3.8
C3-N-RefM-5	nortes	18.7028 N, -91.6424 W	RefM	Avicennia germinans	-28.5	3.4
C3-N-RefM-6	nortes	18.7028 N, -91.6424 W	RefM	Avicennia germinans	-26.4	3.9
C3-N-RefM-7	nortes	18.7028 N, -91.6424 W	RefM	Laguncularia racemosa	-30	1.9
C3-N-RefM-8	nortes	18.7028 N, -91.6424 W	RefM	Laguncularia racemosa	-28.6	0.2
C3-N-RefM-9	nortes	18.7028 N, -91.6424 W	RefM	Laguncularia racemosa	-31.9	2.3
Ses-N-RefM-1	nortes	18.7028 N, -91.6424 W	RefM	seston	-24.5	1.6
Ses-N-RefM-2	nortes	18.7028 N, -91.6424 W	RefM	seston	-21	2
Ses-N-RefM-3	nortes	18.7028 N, -91.6424 W	RefM	seston	-21.8	1.8
Phy-N-RefM-1	nortes	18.7028 N, -91.6424 W	RefM	phytoplankton	-21.3	2.9
Phy-N-RefM-2	nortes	18.7028 N, -91.6424 W	RefM	phytoplankton	-21.8	2.3
Phy-N-RefM-3	nortes	18.7028 N, -91.6424 W	RefM	phytoplankton	-21	3.2
C3-D-RM1-1	dry	18.6721 N, -91.6721 W	RM1	Rhizophora mangle	-27.6	0.2
C3-D-RM1-2	dry	18.6721 N, -91.6721 W	RM1	Rhizophora mangle	-29.2	-3.5
C3-D-RM1-3	dry	18.6721 N, -91.6721 W	RM1	Rhizophora mangle	-28.1	2
C3-D-RM1-4	dry	18.6721 N, -91.6721 W	RM1	Avicennia germinans	-27.3	5
C3-D-RM1-5	dry	18.6721 N, -91.6721 W	RM1	Avicennia germinans	-29.6	3.4
C3-D-RM1-6	dry	18.6721 N, -91.6721 W	RM1	Avicennia germinans	-29.7	6.3
C3-D-RM1-7	dry	18.6721 N, -91.6721 W	RM1	Laguncularia racemosa	-28.2	-2.2
C3-D-RM1-8	dry	18.6721 N, -91.6721 W	RM1	Laguncularia racemosa	-31.8	3.1
C3-D-RM1-9	dry	18.6721 N, -91.6721 W	RM1	Laguncularia racemosa	-29.2	-4.2
C3-D-RM1-10	dry	18.6721 N, -91.6721 W	RM1	Batis maritima	-30.1	2.8
C3-D-RM1-11	dry	18.6721 N, -91.6721 W	RM1	Batis maritima	-30.5	3.5
C3-D-RM1-12	dry	18.6721 N, -91.6721 W	RM1	Batis maritima	-30.4	4.9
Ses-D-RM1-1	dry	18.6721 N, -91.6721 W	RM1	seston	-17.3	1.3
Ses-D-RM1-2	dry	18.6721 N, -91.6721 W	RM1	seston	-12.1	2
Ses-D-RM1-3	dry	18.6721 N, -91.6721 W	RM1	seston	-20.8	1.7
Phy-D-RM1-1	dry	18.6721 N, -91.6721 W	RM1	phytoplankton	-17.4	3.8
Phy-D-RM1-2	dry	18.6721 N, -91.6721 W	RM1	phytoplankton	-18.7	3.5
Phy-D-RM1-3	dry	18.6721 N, -91.6721 W	RM1	phytoplankton	-18.1	3.3
C3-D-RM2-1	dry	18.6928 N, -91.6411 W	RM2	Rhizophora mangle	-27.3	-3.1
C3-D-RM2-2	dry	18.6928 N, -91.6411 W	RM2	Rhizophora mangle	-25.9	-3.9
C3-D-RM2-3	dry	18.6928 N, -91.6411 W	RM2	Rhizophora mangle	-25.9	-2.8
C3-D-RM2-4	dry	18.6928 N, -91.6411 W	RM2	Avicennia germinans	-27.1	4.2
C3-D-RM2-5	dry	18.6928 N, -91.6411 W	RM2	Avicennia germinans	-27.3	-2.8
C3-D-RM2-6	dry	18.6928 N, -91.6411 W	RM2	Avicennia germinans	-26.9	3.5
C3-D-RM2-7	dry	18.6928 N, -91.6411 W	RM2	Laguncularia racemosa	-27.7	-5.6
C3-D-RM2-8	dry	18.6928 N, -91.6411 W	RM2	Laguncularia racemosa	-27.5	-3.4
C3-D-RM2-9	dry	18.6928 N, -91.6411 W	RM2	Laguncularia racemosa	-28.9	-0.6
C3-D-RM2-10	dry	18.6928 N, -91.6411 W	RM2	Batis maritima	-31.5	1
C3-D-RM2-11	dry	18.6928 N, -91.6411 W	RM2	Batis maritima	-29.8	1.3
C3-D-RM2-12	dry	18.6928 N, -91.6411 W	RM2	Batis maritima	-29.2	2
Ses-D-RM2-1	dry	18.6928 N, -91.6411 W	RM2	seston	-18.9	2.4
Ses-D-RM2-2	dry	18.6928 N, -91.6411 W	RM2	seston	-18.2	2.5
Ses-D-RM2-3	dry	18.6928 N, -91.6411 W	RM2	seston	-17	2.5
Phy-D-RM2-1	dry	18.6928 N, -91.6411 W	RM2	phytoplankton	-18.8	2.7
Phy-D-RM2-2	dry	18.6928 N, -91.6411 W	RM2	phytoplankton	-20.4	3.2
Phy-D-RM2-3	dry	18.6928 N, -91.6411 W	RM2	phytoplankton	-19.6	3.8
C3-D-RM3-1	dry	18.6896 N, -91.6596 W	RM3	Rhizophora mangle	-27.9	-4.8
C3-D-RM3-2	dry	18.6896 N, -91.6596 W	RM3	Rhizophora mangle	-25.8	-9.6
C3-D-RM3-3	dry	18.6896 N, -91.6596 W	RM3	Rhizophora mangle	-27.1	-8.1
C3-D-RM3-4	dry	18.6896 N, -91.6596 W	RM3	Avicennia germinans	-27.3	2.8
C3-D-RM3-5	dry	18.6896 N, -91.6596 W	RM3	Avicennia germinans	-27.3	1.4
C3-D-RM3-6	dry	18.6896 N, -91.6596 W	RM3	Avicennia germinans	-25.8	3
C3-D-RM3-7	dry	18.6896 N, -91.6596 W	RM3	Laguncularia racemosa	-27.3	-7.9
C3-D-RM3-8	dry	18.6896 N, -91.6596 W	RM3	Laguncularia racemosa	-28.7	1.8
C3-D-RM3-9	dry	18.6896 N, -91.6596 W	RM3	Laguncularia racemosa	-28	-1.4
C3-D-RM3-10	dry	18.6896 N, -91.6596 W	RM3	Batis maritima	-30.1	3.9
C3-D-RM3-11	dry	18.6896 N, -91.6596 W	RM3	Batis maritima	-28.2	3.4
C3-D-RM3-12	dry	18.6896 N, -91.6596 W	RM3	Batis maritima	-28.7	2.8
Ses-D-RM3-1	dry	18.6896 N, -91.6596 W	RM3	seston	-23.2	1.7
Ses-D-RM3-2	dry	18.6896 N, -91.6596 W	RM3	seston	-22.4	1.4
Ses-D-RM3-3	dry	18.6896 N, -91.6596 W	RM3	seston	-22.8	1.6
Phy-D-RM3-1	dry	18.6896 N, -91.6596 W	RM3	phytoplankton	-20.7	2.7
Phy-D-RM3-2	dry	18.6896 N, -91.6596 W	RM3	phytoplankton	-20.9	3
Phy-D-RM3-3	dry	18.6896 N, -91.6596 W	RM3	phytoplankton	-21.6	2.6
C3-D-RefM-1	dry	18.7028 N, -91.6424 W	RefM	Rhizophora mangle	-28.2	1.2
C3-D-RefM-2	dry	18.7028 N, -91.6424 W	RefM	Rhizophora mangle	-31.5	0.3
C3-D-RefM-3	dry	18.7028 N, -91.6424 W	RefM	Rhizophora mangle	-28.5	0.8
C3-D-RefM-4	dry	18.7028 N, -91.6424 W	RefM	Avicennia germinans	-28.7	3.7
C3-D-RefM-5	dry	18.7028 N, -91.6424 W	RefM	Avicennia germinans	-27.9	2.8
C3-D-RefM-6	dry	18.7028 N, -91.6424 W	RefM	Avicennia germinans	-26.7	3.9
C3-D-RefM-7	dry	18.7028 N, -91.6424 W	RefM	Laguncularia racemosa	-28.2	1.5
C3-D-RefM-8	dry	18.7028 N, -91.6424 W	RefM	Laguncularia racemosa	-26.7	1.7
C3-D-RefM-9	dry	18.7028 N, -91.6424 W	RefM	Laguncularia racemosa	-28.7	-0.1
Ses-D-RefM-1	dry	18.7028 N, -91.6424 W	RefM	seston	-23.6	1
Ses-D-RefM-2	dry	18.7028 N, -91.6424 W	RefM	seston	-19.5	0.9
Ses-D-RefM-3	dry	18.7028 N, -91.6424 W	RefM	seston	-20.2	1.7
Phy-D-RefM-1	dry	18.7028 N, -91.6424 W	RefM	phytoplankton	-23.6	1.8
Phy-D-RefM-2	dry	18.7028 N, -91.6424 W	RefM	phytoplankton	-23	1.9
Phy-D-RefM-3	dry	18.7028 N, -91.6424 W	RefM	phytoplankton	-19.8	3.1

## Sheet: T4
Raw data of δ13C and δ15N values of consumers per area and season.
RM1 = mangrove restored in 2010; RM2 = mangrove restored in 2014; RM3 = mangrove restored in 2018; RefM = reference mangrove.
ID	Season	Coordinates	Restauration status	Group	Ocurrence	Guild	Species	δ13C	δ15N	C:N
Fish-R-RM1-1	rainy	18.6721 N, -91.6721 W	RM1	Fish	seasonal transient	planktivore	Anchoa mitchilli	-21.1	8.1	4
Fish-R-RM1-2	rainy	18.6721 N, -91.6721 W	RM1	Fish	seasonal transient	planktivore	Anchoa mitchilli	-20.4	8.3	3.9
Fish-R-RM1-3	rainy	18.6721 N, -91.6721 W	RM1	Fish	occasional transient	zoobenthivore	Eucinostomus melanopterus	-18.4	8	3.9
Fish-R-RM1-4	rainy	18.6721 N, -91.6721 W	RM1	Fish	occasional transient	zoobenthivore	Eucinostomus melanopterus	-19.4	8	3.8
Fish-R-RM1-5	rainy	18.6721 N, -91.6721 W	RM1	Fish	occasional transient	zoobenthivore	Eucinostomus melanopterus	-17.4	7.9	3.7
Fish-R-RM1-6	rainy	18.6721 N, -91.6721 W	RM1	Fish	resident	zoobenthivore	Gambusia yucatana	-18.5	7.5	4
Fish-R-RM1-7	rainy	18.6721 N, -91.6721 W	RM1	Fish	resident	zoobenthivore	Gambusia yucatana	-21.9	7.2	4.7
Fish-R-RM1-8	rainy	18.6721 N, -91.6721 W	RM1	Fish	resident	zoobenthivore	Gambusia yucatana	-20.2	7.3	4.3
Fish-R-RM1-9	rainy	18.6721 N, -91.6721 W	RM1	Fish	resident	omnivore	Mayaheros urophthalmus	-20.4	7.1	4.1
Inv-R-RM1-1	rainy	18.6721 N, -91.6721 W	RM1	Crustacean		herbivore	Aratus pisonii	-19.9	6.9	3.9
Inv-R-RM1-2	rainy	18.6721 N, -91.6721 W	RM1	Crustacean		zoobenthivore	Menippe mercenaria	-23.1	6.5	3.6
Inv-R-RM1-3	rainy	18.6721 N, -91.6721 W	RM1	Crustacean		zoobenthivore	Menippe mercenaria	-24	5.5	3.8
Inv-R-RM1-4	rainy	18.6721 N, -91.6721 W	RM1	Crustacean		zoobenthivore	Menippe mercenaria	-21.6	5.4	3.6
Inv-R-RM1-5	rainy	18.6721 N, -91.6721 W	RM1	Crustacean		detritivore	Uca sp.	-22.6	4.9	3.9
Inv-R-RM1-6	rainy	18.6721 N, -91.6721 W	RM1	Crustacean		detritivore	Uca sp.	-18.8	7.3	3.5
Inv-R-RM1-7	rainy	18.6721 N, -91.6721 W	RM1	Crustacean		detritivore	Uca sp.	-18.2	6.9	3.5
Inv-R-RM1-8	rainy	18.6721 N, -91.6721 W	RM1	Mollusk		zoobenthivore	Melongena corona	-17.7	5.7	4.3
Inv-R-RM1-9	rainy	18.6721 N, -91.6721 W	RM1	Mollusk		zoobenthivore	Melongena corona	-17.7	6	3.9
Inv-R-RM1-10	rainy	18.6721 N, -91.6721 W	RM1	Mollusk		zoobenthivore	Melongena corona	-17.2	5.9	4.2
Inv-R-RM1-11	rainy	18.6721 N, -91.6721 W	RM1	Mollusk		detritivore	Neritina virginea	-24.5	3.7	4.6
Inv-R-RM1-12	rainy	18.6721 N, -91.6721 W	RM1	Mollusk		detritivore	Neritina virginea	-23.2	3.7	4.5
Inv-R-RM1-13	rainy	18.6721 N, -91.6721 W	RM1	Mollusk		detritivore	Neritina virginea	-23.9	3.7	4.3
Fish-R-RM2-1	rainy	18.6928 N, -91.6411 W	RM2	Fish	occasional transient	zoobenthivore	Eucinostomus melanopterus	-16.6	8	3.5
Fish-R-RM2-2	rainy	18.6928 N, -91.6411 W	RM2	Fish	occasional transient	zoobenthivore	Eucinostomus melanopterus	-19.7	8.7	3.4
Fish-R-RM2-3	rainy	18.6928 N, -91.6411 W	RM2	Fish	occasional transient	zoobenthivore	Eucinostomus melanopterus	-19.6	8.8	3.4
Fish-R-RM2-4	rainy	18.6928 N, -91.6411 W	RM2	Fish	resident	zoobenthivore	Gambusia yucatana	-19.8	7.5	4
Fish-R-RM2-5	rainy	18.6928 N, -91.6411 W	RM2	Fish	resident	zoobenthivore	Gambusia yucatana	-21.2	7.4	4.2
Fish-R-RM2-6	rainy	18.6928 N, -91.6411 W	RM2	Fish	resident	zoobenthivore	Lophogobius cyprinoides	-20	8.6	3.7
Fish-R-RM2-7	rainy	18.6928 N, -91.6411 W	RM2	Fish	resident	zoobenthivore	Lophogobius cyprinoides	-19.2	7.7	3.5
Fish-R-RM2-8	rainy	18.6928 N, -91.6411 W	RM2	Fish	resident	detritivore	Poecilia velifera	-21.8	4.3	4
Inv-R-RM2-1	rainy	18.6928 N, -91.6411 W	RM2	Crustacean		herbivore	Aratus pisonii	-22.9	5.8	3.9
Inv-R-RM2-2	rainy	18.6928 N, -91.6411 W	RM2	Crustacean		omnivore	Callinectes sapidus	-20.2	7.4	3.5
Inv-R-RM2-3	rainy	18.6928 N, -91.6411 W	RM2	Crustacean		omnivore	Callinectes sapidus	-21.1	7.1	3.5
Inv-R-RM2-4	rainy	18.6928 N, -91.6411 W	RM2	Crustacean		omnivore	Callinectes sapidus	-21	6.7	3.5
Inv-R-RM2-5	rainy	18.6928 N, -91.6411 W	RM2	Crustacean		omnivore	Clibanarius vittatus	-19.4	7.3	3.5
Inv-R-RM2-6	rainy	18.6928 N, -91.6411 W	RM2	Crustacean		omnivore	Clibanarius vittatus	-19.7	6.9	3.5
Inv-R-RM2-7	rainy	18.6928 N, -91.6411 W	RM2	Crustacean		zoobenthivore	Menippe mercenaria	-17.7	7.9	3.4
Inv-R-RM2-8	rainy	18.6928 N, -91.6411 W	RM2	Crustacean		zoobenthivore	Menippe mercenaria	-17.4	8.6	3.8
Inv-R-RM2-9	rainy	18.6928 N, -91.6411 W	RM2	Crustacean		zoobenthivore	Menippe mercenaria	-19	7.5	3.4
Inv-R-RM2-10	rainy	18.6928 N, -91.6411 W	RM2	Mollusk		zoobenthivore	Melongena corona	-18	5.3	4.3
Inv-R-RM2-11	rainy	18.6928 N, -91.6411 W	RM2	Mollusk		zoobenthivore	Melongena corona	-18.4	5.5	5
Inv-R-RM2-12	rainy	18.6928 N, -91.6411 W	RM2	Mollusk		zoobenthivore	Melongena corona	-18.3	5.4	5
Fish-R-RM3-1	rainy	18.6896 N, -91.6596 W	RM3	Fish	occasional transient	zoobenthivore	Eucinostomus melanopterus	-19.4	7.9	3.5
Fish-R-RM3-2	rainy	18.6896 N, -91.6596 W	RM3	Fish	occasional transient	zoobenthivore	Eucinostomus melanopterus	-19.9	8.4	3.5
Fish-R-RM3-3	rainy	18.6896 N, -91.6596 W	RM3	Fish	occasional transient	zoobenthivore	Eucinostomus melanopterus	-19.4	8.4	3.5
Fish-R-RM3-4	rainy	18.6896 N, -91.6596 W	RM3	Fish	resident	zoobenthivore	Gambusia yucatana	-20.1	7.5	4.2
Fish-R-RM3-5	rainy	18.6896 N, -91.6596 W	RM3	Fish	resident	zoobenthivore	Gambusia yucatana	-20.3	7.2	4.2
Fish-R-RM3-6	rainy	18.6896 N, -91.6596 W	RM3	Fish	resident	zoobenthivore	Gambusia yucatana	-20	7.3	4.1
Fish-R-RM3-7	rainy	18.6896 N, -91.6596 W	RM3	Fish	seasonal transient	omnivore	Gerres cinereus	-20.9	8.5	3.5
Fish-R-RM3-8	rainy	18.6896 N, -91.6596 W	RM3	Fish	resident	zoobenthivore	Lophogobius cyprinoides	-22.3	7.4	3.4
Fish-R-RM3-9	rainy	18.6896 N, -91.6596 W	RM3	Fish	resident	detritivore	Poecilia velifera	-21.6	5.1	4.1
Fish-R-RM3-10	rainy	18.6896 N, -91.6596 W	RM3	Fish	resident	detritivore	Poecilia velifera	-21.5	4.9	4
Fish-R-RM3-11	rainy	18.6896 N, -91.6596 W	RM3	Fish	occasional	piscivore	Strongylura notata	-19.5	9.6	3.4
Inv-R-RM3-1	rainy	18.6896 N, -91.6596 W	RM3	Crustacean		omnivore	Callinectes sapidus	-23.1	5	3.4
Inv-R-RM3-2	rainy	18.6896 N, -91.6596 W	RM3	Crustacean		detritivore	Uca sp.	-22.7	5.2	3.4
Inv-R-RM3-3	rainy	18.6896 N, -91.6596 W	RM3	Crustacean		detritivore	Uca sp.	-18.9	4.9	3.4
Inv-R-RM3-4	rainy	18.6896 N, -91.6596 W	RM3	Crustacean		detritivore	Uca sp.	-17.9	5.8	3.7
Inv-R-RM3-5	rainy	18.6896 N, -91.6596 W	RM3	Mollusk		zoobenthivore	Melongena corona	-17.8	4.4	4
Inv-R-RM3-6	rainy	18.6896 N, -91.6596 W	RM3	Mollusk		zoobenthivore	Melongena corona	-17.4	5.3	4
Inv-R-RM3-7	rainy	18.6896 N, -91.6596 W	RM3	Mollusk		zoobenthivore	Melongena corona	-17.4	4.6	3.9
Inv-R-RM3-8	rainy	18.6896 N, -91.6596 W	RM3	Mollusk		detritivore	Neritina virginea	-23.2	3.7	4.3
Inv-R-RM3-9	rainy	18.6896 N, -91.6596 W	RM3	Mollusk		detritivore	Neritina virginea	-21.9	3.7	4.8
Fish-R-RefM-1	rainy	18.7028 N, -91.6424 W	RefM	Fish	occasional transient	zoobenthivore	Eucinostomus melanopterus	-19.3	6.6	4.2
Fish-R-RefM-2	rainy	18.7028 N, -91.6424 W	RefM	Fish	occasional transient	zoobenthivore	Eucinostomus melanopterus	-19.1	6.9	4.1
Fish-R-RefM-3	rainy	18.7028 N, -91.6424 W	RefM	Fish	occasional transient	zoobenthivore	Eucinostomus melanopterus	-19	6.9	4
Fish-R-RefM-4	rainy	18.7028 N, -91.6424 W	RefM	Fish	resident	zoobenthivore	Gambusia yucatana	-21.2	5.9	4.4
Fish-R-RefM-5	rainy	18.7028 N, -91.6424 W	RefM	Fish	resident	zoobenthivore	Gambusia yucatana	-24.2	6.9	4.3
Fish-R-RefM-6	rainy	18.7028 N, -91.6424 W	RefM	Fish	resident	zoobenthivore	Gambusia yucatana	-24.3	6.9	4.3
Fish-R-RefM-7	rainy	18.7028 N, -91.6424 W	RefM	Fish	resident	omnivore	Mayaheros urophthalmus	-23.4	6.7	4
Fish-R-RefM-8	rainy	18.7028 N, -91.6424 W	RefM	Fish	resident	omnivore	Mayaheros urophthalmus	-24.8	6.2	4.2
Inv-R-RefM-1	rainy	18.7028 N, -91.6424 W	RefM	Crustacean		herbivore	Aratus pisonii	-24	3.7	3.5
Inv-R-RefM-2	rainy	18.7028 N, -91.6424 W	RefM	Crustacean		herbivore	Aratus pisonii	-24.2	3.6	3.8
Inv-R-RefM-3	rainy	18.7028 N, -91.6424 W	RefM	Crustacean		herbivore	Aratus pisonii	-25.3	2.5	4.3
Inv-R-RefM-4	rainy	18.7028 N, -91.6424 W	RefM	Crustacean		zoobenthivore	Menippe mercenaria	-23.2	4.5	3.6
Inv-R-RefM-5	rainy	18.7028 N, -91.6424 W	RefM	Mollusk		detritivore	Neritina virginea	-21.4	2	5.1
Fish-N-RM1-1	nortes	18.6721 N, -91.6721 W	RM1	Fish	resident	omnivore	Dormitator maculatus	-26.6	6.9	3.5
Fish-N-RM1-2	nortes	18.6721 N, -91.6721 W	RM1	Fish	resident	zoobenthivore	Gambusia yucatana	-21.4	8.5	3.6
Fish-N-RM1-3	nortes	18.6721 N, -91.6721 W	RM1	Fish	resident	zoobenthivore	Gambusia yucatana	-20.8	8	3.6
Fish-N-RM1-4	nortes	18.6721 N, -91.6721 W	RM1	Fish	resident	zoobenthivore	Gambusia yucatana	-19.4	8.6	3.5
Fish-N-RM1-5	nortes	18.6721 N, -91.6721 W	RM1	Fish	resident	zoobenthivore	Gobiomorus dormitor	-20.9	7.6	3.8
Fish-N-RM1-6	nortes	18.6721 N, -91.6721 W	RM1	Fish	resident	omnivore	Mayaheros urophthalmus	-19.2	8.6	3.4
Fish-N-RM1-7	nortes	18.6721 N, -91.6721 W	RM1	Fish	resident	omnivore	Mayaheros urophthalmus	-23.4	7.3	3.5
Fish-N-RM1-8	nortes	18.6721 N, -91.6721 W	RM1	Fish	resident	omnivore	Mayaheros urophthalmus	-23	7.6	3.4
Fish-N-RM1-9	nortes	18.6721 N, -91.6721 W	RM1	Fish	resident	detritivore	Poecilia velifera	-20.6	6.6	3.5
Fish-N-RM1-10	nortes	18.6721 N, -91.6721 W	RM1	Fish	resident	detritivore	Poecilia velifera	-21.1	6.1	3.7
Fish-N-RM1-11	nortes	18.6721 N, -91.6721 W	RM1	Fish	resident	detritivore	Poecilia velifera	-21.6	6	3.7
Inv-N-RM1-1	nortes	18.6721 N, -91.6721 W	RM1	Crustacean		herbivore	Aratus pisonii	-22.8	6.3	3.6
Inv-N-RM1-2	nortes	18.6721 N, -91.6721 W	RM1	Crustacean		herbivore	Aratus pisonii	-22.9	5.7	3.6
Inv-N-RM1-3	nortes	18.6721 N, -91.6721 W	RM1	Crustacean		omnivore	Callinectes sapidus	-18.7	8.4	3.3
Inv-N-RM1-4	nortes	18.6721 N, -91.6721 W	RM1	Crustacean		omnivore	Callinectes sapidus	-21.7	8	3.7
Inv-N-RM1-5	nortes	18.6721 N, -91.6721 W	RM1	Crustacean		omnivore	Callinectes sapidus	-23	6	3.5
Fish-N-RM2-1	nortes	18.6928 N, -91.6411 W	RM2	Fish	seasonal transient	zoobenthivore	Archosargus probatocephalus	-21.3	8.1	3.3
Fish-N-RM2-2	nortes	18.6928 N, -91.6411 W	RM2	Fish	seasonal transient	omnivore	Archosargus rhomboidalis	-15.2	7.1	3.3
Fish-N-RM2-3	nortes	18.6928 N, -91.6411 W	RM2	Fish	seasonal transient	omnivore	Archosargus rhomboidalis	-15.6	7.7	3.3
Fish-N-RM2-4	nortes	18.6928 N, -91.6411 W	RM2	Fish	seasonal transient	omnivore	Archosargus rhomboidalis	-15	7.4	3.3
Fish-N-RM2-5	nortes	18.6928 N, -91.6411 W	RM2	Fish	seasonal transient	piscivore	Centropomus undecimalis	-18.7	8.8	3.5
Fish-N-RM2-6	nortes	18.6928 N, -91.6411 W	RM2	Fish	seasonal transient	piscivore	Centropomus undecimalis	-19.8	9.2	3.3
Fish-N-RM2-7	nortes	18.6928 N, -91.6411 W	RM2	Fish	resident	omnivore	Chaetodipterus faber	-15.3	10.8	3.4
Fish-N-RM2-8	nortes	18.6928 N, -91.6411 W	RM2	Fish	seasonal transient	zoobenthivore	Eucinostomus jonesii	-19.1	8.5	3.3
Fish-N-RM2-9	nortes	18.6928 N, -91.6411 W	RM2	Fish	seasonal transient	zoobenthivore	Eugerres plumieri	-19.5	8.5	3.4
Fish-N-RM2-10	nortes	18.6928 N, -91.6411 W	RM2	Fish	seasonal transient	zoobenthivore	Eugerres plumieri	-19.5	8.3	3.4
Fish-N-RM2-11	nortes	18.6928 N, -91.6411 W	RM2	Fish	resident	zoobenthivore	Gambusia yucatana	-20	7.4	4.3
Fish-N-RM2-12	nortes	18.6928 N, -91.6411 W	RM2	Fish	resident	zoobenthivore	Gambusia yucatana	-19.3	8.5	3.8
Fish-N-RM2-13	nortes	18.6928 N, -91.6411 W	RM2	Fish	resident	zoobenthivore	Gambusia yucatana	-21.5	8.3	4
Fish-N-RM2-14	nortes	18.6928 N, -91.6411 W	RM2	Fish	seasonal transient	omnivore	Gerres cinereus	-19.3	9.9	3.3
Fish-N-RM2-15	nortes	18.6928 N, -91.6411 W	RM2	Fish	seasonal transient	omnivore	Gerres cinereus	-20.4	8.9	3.3
Fish-N-RM2-16	nortes	18.6928 N, -91.6411 W	RM2	Fish	resident	zoobenthivore	Gobiomorus dormitor	-20.7	7.6	3.6
Fish-N-RM2-17	nortes	18.6928 N, -91.6411 W	RM2	Fish	resident	zoobenthivore	Gobiomorus dormitor	-21.3	7.7	3.6
Fish-N-RM2-18	nortes	18.6928 N, -91.6411 W	RM2	Fish	seasonal transient	zoobenthivore	Himantura schmardae	-16	9.4	3.3
Fish-N-RM2-19	nortes	18.6928 N, -91.6411 W	RM2	Fish	seasonal transient	zoobenthivore	Himantura schmardae	-16.2	9.6	3.3
Fish-N-RM2-20	nortes	18.6928 N, -91.6411 W	RM2	Fish	resident	zoobenthivore	Lophogobius cyprinoides	-20.6	8	3.4
Fish-N-RM2-21	nortes	18.6928 N, -91.6411 W	RM2	Fish	resident	zoobenthivore	Lophogobius cyprinoides	-21.1	8.2	3.5
Fish-N-RM2-22	nortes	18.6928 N, -91.6411 W	RM2	Fish	resident	zoobenthivore	Lophogobius cyprinoides	-22.1	7.7	3.5
Fish-N-RM2-23	nortes	18.6928 N, -91.6411 W	RM2	Fish	seasonal transient	piscivore	Lutjanus griseus	-18.5	9.8	3.3
Fish-N-RM2-24	nortes	18.6928 N, -91.6411 W	RM2	Fish	resident	omnivore	Mayaheros urophthalmus	-19.9	8.3	3.4
Fish-N-RM2-25	nortes	18.6928 N, -91.6411 W	RM2	Fish	resident	omnivore	Mayaheros urophthalmus	-18.8	8.8	3.4
Fish-N-RM2-26	nortes	18.6928 N, -91.6411 W	RM2	Fish	resident	omnivore	Mayaheros urophthalmus	-19.9	7.9	3.3
Fish-N-RM2-27	nortes	18.6928 N, -91.6411 W	RM2	Fish	resident	detritivore	Poecilia velifera	-17.6	6.6	3.6
Fish-N-RM2-28	nortes	18.6928 N, -91.6411 W	RM2	Fish	resident	detritivore	Poecilia velifera	-16.3	6.5	3.8
Fish-N-RM2-29	nortes	18.6928 N, -91.6411 W	RM2	Fish	resident	detritivore	Poecilia velifera	-18.2	6.5	3.7
Inv-N-RM2-1	nortes	18.6928 N, -91.6411 W	RM2	Crustacean		omnivore	Callinectes sapidus	-22.5	6.6	3.2
Inv-N-RM2-2	nortes	18.6928 N, -91.6411 W	RM2	Crustacean		omnivore	Callinectes sapidus	-19.3	7.7	3.1
Inv-N-RM2-3	nortes	18.6928 N, -91.6411 W	RM2	Crustacean		omnivore	Callinectes sapidus	-23.7	6.8	3.2
Inv-N-RM2-4	nortes	18.6928 N, -91.6411 W	RM2	Mollusk		zoobenthivore	Melongena corona	-17	5.9	3.7
Inv-N-RM2-5	nortes	18.6928 N, -91.6411 W	RM2	Mollusk		zoobenthivore	Melongena corona	-16.8	6.4	4.3
Inv-N-RM2-6	nortes	18.6928 N, -91.6411 W	RM2	Mollusk		zoobenthivore	Melongena corona	-17.4	5.9	4.4
Fish-N-RM3-1	nortes	18.6896 N, -91.6596 W	RM3	Fish	resident	omnivore	Fundulus persimilis	-19.4	7.7	3.5
Fish-N-RM3-2	nortes	18.6896 N, -91.6596 W	RM3	Fish	resident	omnivore	Fundulus persimilis	-18.7	7.7	3.7
Fish-N-RM3-3	nortes	18.6896 N, -91.6596 W	RM3	Fish	resident	zoobenthivore	Gambusia yucatana	-20.2	7.8	3.7
Fish-N-RM3-4	nortes	18.6896 N, -91.6596 W	RM3	Fish	resident	zoobenthivore	Gambusia yucatana	-20.6	7.8	3.9
Fish-N-RM3-5	nortes	18.6896 N, -91.6596 W	RM3	Fish	resident	zoobenthivore	Gambusia yucatana	-20.9	7.6	4
Fish-N-RM3-6	nortes	18.6896 N, -91.6596 W	RM3	Fish	resident	omnivore	Mayaheros urophthalmus	-20.5	8.1	3.4
Fish-N-RM3-7	nortes	18.6896 N, -91.6596 W	RM3	Fish	resident	omnivore	Mayaheros urophthalmus	-19.9	8.6	3.4
Fish-N-RM3-8	nortes	18.6896 N, -91.6596 W	RM3	Fish	resident	omnivore	Mayaheros urophthalmus	-23.3	7.8	3.4
Fish-N-RM3-9	nortes	18.6896 N, -91.6596 W	RM3	Fish	resident	detritivore	Poecilia velifera	-23	5.7	4
Fish-N-RM3-10	nortes	18.6896 N, -91.6596 W	RM3	Fish	resident	detritivore	Poecilia velifera	-23	6.4	3.7
Fish-N-RM3-11	nortes	18.6896 N, -91.6596 W	RM3	Fish	resident	detritivore	Poecilia velifera	-23.2	6.9	3.8
Inv-N-RM3-1	nortes	18.6896 N, -91.6596 W	RM3	Crustacean		herbivore	Aratus pisonii	-23.8	4.5	3.6
Inv-N-RM3-2	nortes	18.6896 N, -91.6596 W	RM3	Crustacean		herbivore	Aratus pisonii	-24	3.7	3.7
Inv-N-RM3-3	nortes	18.6896 N, -91.6596 W	RM3	Crustacean		herbivore	Aratus pisonii	-23.3	4.7	3.6
Inv-N-RM3-4	nortes	18.6896 N, -91.6596 W	RM3	Crustacean		detritivore	Uca sp.	-18.1	5.6	3.5
Inv-N-RM3-5	nortes	18.6896 N, -91.6596 W	RM3	Crustacean		detritivore	Uca sp.	-18.5	5.2	3.5
Inv-N-RM3-6	nortes	18.6896 N, -91.6596 W	RM3	Crustacean		detritivore	Uca sp.	-18.9	5.7	3.5
Inv-N-RM3-7	nortes	18.6896 N, -91.6596 W	RM3	Mollusk		detritivore	Melampus coffea	-19.3	5.5	3.5
Inv-N-RM3-8	nortes	18.6896 N, -91.6596 W	RM3	Mollusk		detritivore	Melampus coffea	-19.9	5.6	3.5
Inv-N-RM3-9	nortes	18.6896 N, -91.6596 W	RM3	Mollusk		zoobenthivore	Melongena corona	-17.8	5	4
Inv-N-RM3-10	nortes	18.6896 N, -91.6596 W	RM3	Mollusk		zoobenthivore	Melongena corona	-18.2	5	3.2
Inv-N-RM3-11	nortes	18.6896 N, -91.6596 W	RM3	Mollusk		zoobenthivore	Melongena corona	-18.1	4.6	4.3
Fish-N-RefM-1	nortes	18.7028 N, -91.6424 W	RefM	Fish	seasonal transient	omnivore	Archosargus rhomboidalis	-19.2	5.7	3.3
Fish-N-RefM-2	nortes	18.7028 N, -91.6424 W	RefM	Fish	seasonal transient	omnivore	Archosargus rhomboidalis	-20.6	7.2	3.4
Fish-N-RefM-3	nortes	18.7028 N, -91.6424 W	RefM	Fish	seasonal transient	piscivore	Centropomus undecimalis	-16.2	9.1	3.3
Fish-N-RefM-4	nortes	18.7028 N, -91.6424 W	RefM	Fish	resident	zoobenthivore	Gambusia yucatana	-25.7	7.3	3.7
Fish-N-RefM-5	nortes	18.7028 N, -91.6424 W	RefM	Fish	resident	zoobenthivore	Gambusia yucatana	-24	8.2	3.6
Fish-N-RefM-6	nortes	18.7028 N, -91.6424 W	RefM	Fish	resident	zoobenthivore	Gambusia yucatana	-24.5	7.7	3.7
Fish-N-RefM-7	nortes	18.7028 N, -91.6424 W	RefM	Fish	resident	omnivore	Mayaheros urophthalmus	-23.5	7.4	3.4
Fish-N-RefM-8	nortes	18.7028 N, -91.6424 W	RefM	Fish	resident	omnivore	Mayaheros urophthalmus	-24.5	7.1	3.4
Fish-N-RefM-9	nortes	18.7028 N, -91.6424 W	RefM	Fish	resident	omnivore	Mayaheros urophthalmus	-25.9	7.1	3.4
Fish-N-RefM-10	nortes	18.7028 N, -91.6424 W	RefM	Fish	resident	omnivore	Mayaheros urophthalmus	-24.4	7.6	3.4
Fish-N-RefM-11	nortes	18.7028 N, -91.6424 W	RefM	Fish	resident	omnivore	Mayaheros urophthalmus	-23.8	7.9	3.4
Fish-N-RefM-12	nortes	18.7028 N, -91.6424 W	RefM	Fish	resident	detritivore	Poecilia velifera	-28.2	3.7	3.6
Fish-N-RefM-13	nortes	18.7028 N, -91.6424 W	RefM	Fish	resident	detritivore	Poecilia velifera	-27.2	5.3	3.8
Fish-N-RefM-14	nortes	18.7028 N, -91.6424 W	RefM	Fish	resident	detritivore	Poecilia velifera	-26.7	6	3.5
Inv-N-RefM-1	nortes	18.7028 N, -91.6424 W	RefM	Crustacean		herbivore	Aratus pisonii	-24.4	2.8	3.4
Inv-N-RefM-2	nortes	18.7028 N, -91.6424 W	RefM	Crustacean		herbivore	Aratus pisonii	-24.9	3.7	3.5
Inv-N-RefM-3	nortes	18.7028 N, -91.6424 W	RefM	Crustacean		herbivore	Aratus pisonii	-24.7	2.9	3.4
Inv-N-RefM-4	nortes	18.7028 N, -91.6424 W	RefM	Crustacean		omnivore	Callinectes sapidus	-23.9	6.6	3.4
Inv-N-RefM-5	nortes	18.7028 N, -91.6424 W	RefM	Crustacean		omnivore	Callinectes sapidus	-25.6	7.6	3.4
Fish-D-RM1-1	dry	18.6721 N, -91.6721 W	RM1	Fish	seasonal transient	omnivore	Archosargus rhomboidalis	-12.2	5.6	3.3
Fish-D-RM1-2	dry	18.6721 N, -91.6721 W	RM1	Fish	seasonal transient	zoobenthivore	Eucinostomus jonesii	-18.7	9.9	3.4
Fish-D-RM1-3	dry	18.6721 N, -91.6721 W	RM1	Fish	resident	zoobenthivore	Gambusia yucatana	-20.3	7.6	3.7
Fish-D-RM1-4	dry	18.6721 N, -91.6721 W	RM1	Fish	resident	zoobenthivore	Gambusia yucatana	-20.7	8.6	3.8
Fish-D-RM1-5	dry	18.6721 N, -91.6721 W	RM1	Fish	resident	zoobenthivore	Gambusia yucatana	-20.1	9	3.7
Fish-D-RM1-6	dry	18.6721 N, -91.6721 W	RM1	Fish	resident	detritivore	Garmanella pulchra	-18.1	7.7	3.6
Fish-D-RM1-7	dry	18.6721 N, -91.6721 W	RM1	Fish	resident	omnivore	Mayaheros urophthalmus	-20.4	8.6	3.3
Fish-D-RM1-8	dry	18.6721 N, -91.6721 W	RM1	Fish	resident	omnivore	Mayaheros urophthalmus	-19	8.3	3.3
Fish-D-RM1-9	dry	18.6721 N, -91.6721 W	RM1	Fish	resident	omnivore	Mayaheros urophthalmus	-21.7	8.2	3.4
Fish-D-RM1-10	dry	18.6721 N, -91.6721 W	RM1	Fish	resident	omnivore	Mayaheros urophthalmus	-21.8	8	3.4
Fish-D-RM1-11	dry	18.6721 N, -91.6721 W	RM1	Fish	resident	omnivore	Mayaheros urophthalmus	-18.4	8.8	3.5
Fish-D-RM1-12	dry	18.6721 N, -91.6721 W	RM1	Fish	resident	detritivore	Poecilia velifera	-20.5	6.9	3.7
Fish-D-RM1-13	dry	18.6721 N, -91.6721 W	RM1	Fish	resident	detritivore	Poecilia velifera	-19.3	6.1	3.7
Fish-D-RM1-14	dry	18.6721 N, -91.6721 W	RM1	Fish	resident	detritivore	Poecilia velifera	-19.3	6.1	3.7
Fish-D-RM1-15	dry	18.6928 N, -91.6411 W	RM2	Fish	seasonal transient	omnivore	Archosargus rhomboidalis	-16.2	7.9	4.5
Inv-D-RM1-1	dry	18.6721 N, -91.6721 W	RM1	Crustacean		herbivore	Aratus pisonii	-23.1	6.1	3.6
Inv-D-RM1-2	dry	18.6721 N, -91.6721 W	RM1	Crustacean		herbivore	Aratus pisonii	-23.3	6.3	3.6
Inv-D-RM1-3	dry	18.6721 N, -91.6721 W	RM1	Crustacean		herbivore	Aratus pisonii	-23.3	5.8	3.6
Inv-D-RM1-4	dry	18.6721 N, -91.6721 W	RM1	Crustacean		omnivore	Callinectes sapidus	-18.8	7.7	3.5
Fish-D-RM2-1	dry	18.6928 N, -91.6411 W	RM2	Fish	seasonal transient	piscivore	Centropomus undecimalis	-18.6	7.6	3.3
Fish-D-RM2-2	dry	18.6928 N, -91.6411 W	RM2	Fish	seasonal transient	piscivore	Centropomus undecimalis	-18.4	9.5	3.3
Fish-D-RM2-3	dry	18.6928 N, -91.6411 W	RM2	Fish	seasonal transient	zoobenthivore	Eucinostomus jonesii	-17.9	9.1	3.5
Fish-D-RM2-4	dry	18.6928 N, -91.6411 W	RM2	Fish	seasonal transient	zoobenthivore	Eucinostomus jonesii	-18.4	9	3.4
Fish-D-RM2-5	dry	18.6928 N, -91.6411 W	RM2	Fish	seasonal transient	zoobenthivore	Eucinostomus jonesii	-18.8	8.8	3.3
Fish-D-RM2-6	dry	18.6928 N, -91.6411 W	RM2	Fish	seasonal transient	zoobenthivore	Eucinostomus jonesii	-18.9	9.1	3.4
Fish-D-RM2-7	dry	18.6928 N, -91.6411 W	RM2	Fish	seasonal transient	zoobenthivore	Eugerres plumieri	-17.1	8.5	3.3
Fish-D-RM2-8	dry	18.6928 N, -91.6411 W	RM2	Fish	seasonal transient	zoobenthivore	Eugerres plumieri	-20.3	8.4	3.5
Fish-D-RM2-9	dry	18.6928 N, -91.6411 W	RM2	Fish	resident	planktivore	Floridichthys polyommus	-18.8	8.5	3.5
Fish-D-RM2-10	dry	18.6928 N, -91.6411 W	RM2	Fish	resident	planktivore	Floridichthys polyommus	-18.9	8.5	3.6
Fish-D-RM2-11	dry	18.6928 N, -91.6411 W	RM2	Fish	resident	omnivore	Fundulus persimilis	-19.6	8.9	3.5
Fish-D-RM2-12	dry	18.6928 N, -91.6411 W	RM2	Fish	resident	omnivore	Fundulus persimilis	-18.1	9	3.5
Fish-D-RM2-13	dry	18.6928 N, -91.6411 W	RM2	Fish	resident	omnivore	Fundulus persimilis	-19	8.3	3.5
Fish-D-RM2-14	dry	18.6928 N, -91.6411 W	RM2	Fish	resident	zoobenthivore	Gambusia yucatana	-20.4	9	3.8
Fish-D-RM2-15	dry	18.6928 N, -91.6411 W	RM2	Fish	resident	zoobenthivore	Gambusia yucatana	-20.1	8.8	4.1
Fish-D-RM2-16	dry	18.6928 N, -91.6411 W	RM2	Fish	resident	zoobenthivore	Gambusia yucatana	-20.7	9.1	4.1
Fish-D-RM2-17	dry	18.6928 N, -91.6411 W	RM2	Fish	resident	detritivore	Garmanella pulchra	-19.2	7.4	3.7
Fish-D-RM2-18	dry	18.6928 N, -91.6411 W	RM2	Fish	resident	detritivore	Garmanella pulchra	-17.5	8.8	3.6
Fish-D-RM2-19	dry	18.6928 N, -91.6411 W	RM2	Fish	resident	detritivore	Garmanella pulchra	-18.3	7.9	3.8
Fish-D-RM2-20	dry	18.6928 N, -91.6411 W	RM2	Fish	seasonal transient	omnivore	Gerres cinereus	-17.5	9.3	3.3
Fish-D-RM2-21	dry	18.6928 N, -91.6411 W	RM2	Fish	seasonal transient	omnivore	Gerres cinereus	-19.9	8.9	3.3
Fish-D-RM2-22	dry	18.6928 N, -91.6411 W	RM2	Fish	resident	omnivore	Mayaheros urophthalmus	-17.2	7.4	3.6
Fish-D-RM2-23	dry	18.6928 N, -91.6411 W	RM2	Fish	resident	omnivore	Mayaheros urophthalmus	-17	7.8	3.5
Fish-D-RM2-24	dry	18.6928 N, -91.6411 W	RM2	Fish	resident	omnivore	Mayaheros urophthalmus	-20.3	8.8	3.3
Fish-D-RM2-25	dry	18.6928 N, -91.6411 W	RM2	Fish	resident	omnivore	Mayaheros urophthalmus	-20.3	8.9	3.3
Fish-D-RM2-26	dry	18.6928 N, -91.6411 W	RM2	Fish	resident	detritivore	Poecilia velifera	-17.5	7.8	3.5
Fish-D-RM2-27	dry	18.6928 N, -91.6411 W	RM2	Fish	resident	detritivore	Poecilia velifera	-17.5	7.7	3.5
Fish-D-RM2-28	dry	18.6928 N, -91.6411 W	RM2	Fish	resident	detritivore	Poecilia velifera	-17.1	7.7	3.6
Inv-D-RM2-1	dry	18.6928 N, -91.6411 W	RM2	Crustacean		omnivore	Callinectes sapidus	-18.7	7.8	3.4
Inv-D-RM2-2	dry	18.6928 N, -91.6411 W	RM2	Crustacean		omnivore	Callinectes sapidus	-19.5	7.3	3.4
Inv-D-RM2-3	dry	18.6928 N, -91.6411 W	RM2	Crustacean		omnivore	Callinectes sapidus	-20.1	6.8	3.5
Fish-D-RM3-1	dry	18.6896 N, -91.6596 W	RM3	Fish	seasonal transient	zoobenthivore	Eucinostomus jonesii	-22.4	7.9	3.4
Fish-D-RM3-2	dry	18.6896 N, -91.6596 W	RM3	Fish	seasonal transient	zoobenthivore	Eucinostomus jonesii	-20.3	8.9	3.4
Fish-D-RM3-3	dry	18.6896 N, -91.6596 W	RM3	Fish	seasonal transient	zoobenthivore	Eucinostomus jonesii	-19.6	8.9	3.4
Fish-D-RM3-4	dry	18.6896 N, -91.6596 W	RM3	Fish	resident	omnivore	Fundulus persimilis	-20.6	8	3.5
Fish-D-RM3-5	dry	18.6896 N, -91.6596 W	RM3	Fish	resident	omnivore	Fundulus persimilis	-18.2	7.3	3.5
Fish-D-RM3-6	dry	18.6896 N, -91.6596 W	RM3	Fish	resident	zoobenthivore	Gambusia yucatana	-19.5	8.8	3.9
Fish-D-RM3-7	dry	18.6896 N, -91.6596 W	RM3	Fish	resident	zoobenthivore	Gambusia yucatana	-19.6	8.7	4
Fish-D-RM3-8	dry	18.6896 N, -91.6596 W	RM3	Fish	resident	zoobenthivore	Gambusia yucatana	-21.2	8.7	4.3
Fish-D-RM3-9	dry	18.6896 N, -91.6596 W	RM3	Fish	resident	detritivore	Garmanella pulchra	-18	6.2	3.8
Fish-D-RM3-10	dry	18.6896 N, -91.6596 W	RM3	Fish	resident	detritivore	Garmanella pulchra	-19.3	7.6	3.7
Fish-D-RM3-11	dry	18.6896 N, -91.6596 W	RM3	Fish	resident	detritivore	Garmanella pulchra	-19.2	7	4.1
Fish-D-RM3-12	dry	18.6896 N, -91.6596 W	RM3	Fish	resident	detritivore	Poecilia velifera	-18.4	6	3.7
Fish-D-RM3-13	dry	18.6896 N, -91.6596 W	RM3	Fish	resident	detritivore	Poecilia velifera	-18	6.2	3.8
Fish-D-RM3-14	dry	18.6896 N, -91.6596 W	RM3	Fish	resident	detritivore	Poecilia velifera	-18.4	5.8	3.9
Inv-D-RM3-1	dry	18.6896 N, -91.6596 W	RM3	Crustacean		herbivore	Aratus pisonii	-23.9	4.1	3.5
Inv-D-RM3-2	dry	18.6896 N, -91.6596 W	RM3	Crustacean		detritivore	Uca sp.	-17.7	5.9	3.5
Inv-D-RM3-3	dry	18.6896 N, -91.6596 W	RM3	Crustacean		detritivore	Uca sp.	-15.6	5.8	3.4
Inv-D-RM3-4	dry	18.6896 N, -91.6596 W	RM3	Crustacean		detritivore	Uca sp.	-16.9	6.1	3.5
Inv-D-RM3-5	dry	18.6896 N, -91.6596 W	RM3	Mollusk		zoobenthivore	Melongena corona	-19	4.8	4.6
Inv-D-RM3-6	dry	18.6896 N, -91.6596 W	RM3	Mollusk		zoobenthivore	Melongena corona	-19	5.6	4.1
Inv-D-RM3-7	dry	18.6896 N, -91.6596 W	RM3	Mollusk		zoobenthivore	Melongena corona	-18.6	5.1	4
Inv-D-RM3-8	dry	18.6896 N, -91.6596 W	RM3	Mollusk		zoobenthivore	Melongena corona	-19.6	4.8	4
Inv-D-RM3-9	dry	18.6896 N, -91.6596 W	RM3	Mollusk		zoobenthivore	Melongena corona	-19	5	4.7
Inv-D-RM3-10	dry	18.6896 N, -91.6596 W	RM3	Mollusk		zoobenthivore	Melongena corona	-18.4	4.7	4
Fish-D-RefM-1	dry	18.7028 N, -91.6424 W	RefM	Fish	seasonal transient	omnivore	Archosargus rhomboidalis	-18.9	6.1	3.3
Fish-D-RefM-2	dry	18.7028 N, -91.6424 W	RefM	Fish	seasonal transient	omnivore	Archosargus rhomboidalis	-13.4	5.1	3.3
Fish-D-RefM-3	dry	18.7028 N, -91.6424 W	RefM	Fish	seasonal transient	omnivore	Archosargus rhomboidalis	-16.9	5.7	3.3
Fish-D-RefM-4	dry	18.7028 N, -91.6424 W	RefM	Fish	seasonal transient	piscivore	Centropomus undecimalis	-21.9	9	3.3
Fish-D-RefM-5	dry	18.7028 N, -91.6424 W	RefM	Fish	seasonal transient	zoobenthivore	Eucinostomus jonesii	-19.9	8.2	3.5
Fish-D-RefM-6	dry	18.7028 N, -91.6424 W	RefM	Fish	seasonal transient	zoobenthivore	Eucinostomus jonesii	-20	8	3.5
Fish-D-RefM-7	dry	18.7028 N, -91.6424 W	RefM	Fish	seasonal transient	zoobenthivore	Eucinostomus jonesii	-20	8	3.5
Fish-D-RefM-8	dry	18.7028 N, -91.6424 W	RefM	Fish	resident	zoobenthivore	Gambusia yucatana	-22.4	6.9	3.5
Fish-D-RefM-9	dry	18.7028 N, -91.6424 W	RefM	Fish	resident	zoobenthivore	Gambusia yucatana	-25.4	7.7	3.6
Fish-D-RefM-10	dry	18.7028 N, -91.6424 W	RefM	Fish	resident	zoobenthivore	Gambusia yucatana	-26.5	8.5	3.8
Fish-D-RefM-11	dry	18.7028 N, -91.6424 W	RefM	Fish	resident	omnivore	Mayaheros urophthalmus	-25.1	5.5	3.4
Fish-D-RefM-12	dry	18.7028 N, -91.6424 W	RefM	Fish	resident	omnivore	Mayaheros urophthalmus	-22.9	7.5	3.6
Fish-D-RefM-13	dry	18.7028 N, -91.6424 W	RefM	Fish	resident	omnivore	Mayaheros urophthalmus	-15.2	6.6	3.6
Fish-D-RefM-14	dry	18.7028 N, -91.6424 W	RefM	Fish	resident	omnivore	Mayaheros urophthalmus	-20.9	7.7	3.6
Fish-D-RefM-15	dry	18.7028 N, -91.6424 W	RefM	Fish	resident	omnivore	Mayaheros urophthalmus	-18.2	7.1	3.6
Fish-D-RefM-16	dry	18.7028 N, -91.6424 W	RefM	Fish	occasional transient	piscivore	Megalops atlanticus	-17.9	9.5	3.4
Inv-D-RefM-1	dry	18.7028 N, -91.6424 W	RefM	Crustacean		herbivore	Aratus pisonii	-23.8	3.7	3.6
Inv-D-RefM-2	dry	18.7028 N, -91.6424 W	RefM	Crustacean		herbivore	Aratus pisonii	-24.9	4.1	3.6
Inv-D-RefM-3	dry	18.7028 N, -91.6424 W	RefM	Crustacean		omnivore	Callinectes sapidus	-21	7.4	3.5
Inv-D-RefM-4	dry	18.7028 N, -91.6424 W	RefM	Crustacean		omnivore	Callinectes sapidus	-19.9	7.2	3.5

## Sheet: T5
Mean and SD of δ13C and δ15N values of basal sources per area and season. Seston was not used in the mixing models.
RM1 = mangrove restored in 2010; RM2 = mangrove restored in 2014; RM3 = mangrove restored in 2018; RefM = reference mangrove.
	Rain					Nortes					Dry
	δ13C (‰)		δ15N (‰)			δ13C (‰)		δ15N (‰)			δ13C (‰)		δ15N (‰)
RM1	mean	SD	mean	SD		mean	SD	mean	SD		mean	SD	mean	SD
C3 plants	-27.8	1.5	3.8	1.9		-28.7	1.4	2.5	2.9		-29.3	1.3	1.8	3.5
Phytoplankton	-23.8	1.3	4	0.8		-21.6	0.8	2.7	0.2		-18.1	0.7	3.5	0.3
Seston	-24.8	0.84	3.2	0.23		-17.84	2.89	1.77	0.08		-16.72	4.38	1.63	0.34
Seagrass	-15.4	0.6	-1.8	1.2		-15.4	0.6	-1.8	1.2		-9.5	0.1	-1.2	1.4
Epiphytes	-19	0.6	3	0.9		-19	0.6	3	0.9		-16.5	0.6	2.6	0.9
RM2
C3 plants	-26.6	1.2	-2.5	3.7		-27.8	1.9	-2.2	3		-27.9	1.7	-0.9	3.2
Phytoplankton	-24.2	1	4.4	0.6		-20.3	0.6	3.6	0.4		-19.6	0.8	3.2	0.5
Seston	-26.17	1.45	2.71	0.36		-19.35	0.72	2.17	0.21		-18	0.97	2.48	0.06
Seagrass	-15.4	0.6	-1.8	1.2		-15.4	0.6	-1.8	1.2		-9.5	0.1	-1.2	1.4
Epiphytes	-19	0.6	3	0.9		-19	0.6	3	0.9		-16.5	0.6	2.6	0.9
RM3
C3 plants	-26.4	0.8	-1.5	4.2		-27.7	1.1	-1.7	4.4		-27.7	1.2	-1.1	5.1
Phytoplankton	-24.4	0.9	3.1	1.7		-22.3	0.4	2.1	0.7		-21.1	0.5	2.8	0.2
Seston	-25.45	0.67	2.54	0.59		-22.37	0.9	1.03	0.43		-22.8	0.37	1.55	0.11
Seagrass	-15.4	0.6	-1.8	1.2		-15.4	0.6	-1.8	1.2		-9.5	0.1	-1.2	1.4
Epiphytes	-19	0.6	3	0.9		-19	0.6	3	0.9		-16.5	0.6	2.6	0.9
RefM
C3 plants	-28.4	1.5	2.7	1.8		-29.2	1.8	1.9	1.5		-28.3	1.4	1.7	1.5
Phytoplankton	-24.1	0.8	3.8	0.1		-21.4	0.4	2.8	0.4		-22.1	2	2.2	0.7
Seston	-25.94	0.53	3.47	0.34		-22.46	1.82	1.78	0.19		-21.1	2.19	1.21	0.44
Seagrass	-15.4	0.6	-1.8	1.2		-15.4	0.6	-1.8	1.2		-9.5	0.1	-1.2	1.4
Epiphytes	-19	0.6	3	0.9		-19	0.6	3	0.9		-16.5	0.6	2.6	0.9

## Sheet: T6
Variable loadings for the two principal component analysis of environmental parameters of mangrove areas.
TDS = total dissolved solids, DO = dissolved oxygen. Important loadings are shown in bold.
	PC1	PC2
	4.0175	1.4674
Eigenvalue	0.5022	0.1834
Proportion Explained	-0.534	0.62
Depth	-0.089	0.839
Temperature	1.405	0.147
TDS	1.356	0.357
Conductivity	1.364	0.3
Salinity	0.875	-0.82
DO	1.17	-0.422
pH	-0.547	-0.945
Clorophyll a
